# Supplementary material for: B Cell Subsets as Severity-Associated Signatures in COVID-19 Patients
Source: PubMed Central journal article supplement (PMC7744304; doi:10.3389/fimmu.2020.611004), 2020-12-03
Supplement: DataSheet_1.pdf [file DataSheet_1.pdf]

## *Supplementary Material*

**Supplementary Table 1.** Antibodies and flow cytometry reagents used for flow cytometry analysis.

| <b>Antibody/reagent</b>              | <b>Manufacturer</b> | <b>Catalog number</b> |
|--------------------------------------|---------------------|-----------------------|
| BUV496 anti-human CD19               | BD Horizon          | 564656                |
| APC/Cy7 anti-human CD27              | BioLegend           | 302816                |
| PerCP/Cyanine5.5 anti-human IgD      | BioLegend           | 348208                |
| Brilliant Violet 421 anti-human CD24 | BioLegend           | 31122                 |
| Brilliant Violet 650 anti-human CD38 | BioLegend           | 356620                |
| Alexa Fluor 700 anti-human CD21      | BioLegend           | 354918                |
| PE/Dazzle 594 anti-human CD11c       | BioLegend           | 301642                |
| Zombie Green fixable viability kit   | BioLegend           | 423112                |

**Supplementary Table 2.** B cell subsets definitions and phenotypes.

| Parental population                                       | Subset definitions and phenotype                                                                                                                                                                                 |
|-----------------------------------------------------------|------------------------------------------------------------------------------------------------------------------------------------------------------------------------------------------------------------------|
| Transitional 1/2                                          | <b>Transitional CD21<sup>neg/lo</sup> (Tr CD21<sup>neg/lo</sup>)</b><br>CD19 <sup>pos</sup> CD27 <sup>neg</sup> CD38 <sup>hi</sup> CD24 <sup>hi</sup> CD21 <sup>neg/lo</sup>                                     |
|                                                           | <b>Transitional CD21<sup>pos</sup> (Tr CD21<sup>pos</sup>)</b><br>CD19 <sup>pos</sup> CD27 <sup>neg</sup> CD38 <sup>hi</sup> CD24 <sup>lo</sup> CD21 <sup>pos</sup>                                              |
| Naive                                                     | <b>Resting Naive (resN)</b><br>CD19 <sup>pos</sup> CD27 <sup>neg</sup> IgD <sup>pos</sup> CD38 <sup>pos</sup> CD24 <sup>neg</sup> CD11c <sup>neg</sup>                                                           |
|                                                           | <b>Activated Naive (actN)</b><br>CD19 <sup>pos</sup> CD27 <sup>neg</sup> IgD <sup>pos</sup> CD38 <sup>neg</sup> CD24 <sup>neg</sup> CD11c <sup>pos</sup>                                                         |
| Antibody-Secreting Cells                                  | <b>Plasmablasts (ASC)</b><br>CD19 <sup>pos</sup> CD27 <sup>hi</sup> CD38 <sup>hi</sup>                                                                                                                           |
| Classic Memory                                            | <b>Unswitched Classical Memory (USwM)</b><br>CD19 <sup>pos</sup> CD27 <sup>pos</sup> IgD <sup>pos</sup>                                                                                                          |
|                                                           | <b>Switched Classical Memory (SwM)</b><br>CD19 <sup>pos</sup> CD27 <sup>pos</sup> IgD <sup>neg</sup>                                                                                                             |
| Non-classic Memory (CD27 <sup>neg</sup> )                 | <b>Non-Classic CD27<sup>neg</sup> IgD<sup>neg</sup> Memory (M CD27<sup>neg</sup> IgD<sup>neg</sup>)</b><br>CD19 <sup>pos</sup> CD38 <sup>neg/lo</sup> CD24 <sup>pos</sup> CD27 <sup>neg</sup> IgD <sup>neg</sup> |
|                                                           | <b>Non-Classic CD27<sup>neg</sup> IgD<sup>pos</sup> Memory (M CD27<sup>neg</sup> IgD<sup>pos</sup>)</b><br>CD19 <sup>pos</sup> CD38 <sup>neg/lo</sup> CD24 <sup>pos</sup> CD27 <sup>neg</sup> IgD <sup>pos</sup> |
| Double Negative (CD27 <sup>neg</sup> IgD <sup>neg</sup> ) | <b>Double Negative 1 (DN1)</b><br>CD19 <sup>pos</sup> CD27 <sup>neg</sup> IgD <sup>neg</sup> CD38 <sup>neg/pos</sup> CD24 <sup>neg</sup> CD21 <sup>pos</sup> CD11c <sup>neg</sup>                                |
|                                                           | <b>Double Negative 2 (DN2)</b><br>CD19 <sup>pos</sup> CD27 <sup>neg</sup> IgD <sup>neg</sup> CD38 <sup>neg</sup> CD24 <sup>neg</sup> CD21 <sup>neg</sup> CD11c <sup>pos</sup>                                    |
|                                                           | <b>Double Negative 3 (DN3)</b><br>CD19 <sup>pos</sup> CD27 <sup>neg</sup> IgD <sup>neg</sup> CD38 <sup>neg/pos</sup> CD24 <sup>neg</sup> CD21 <sup>neg</sup> CD11c <sup>neg</sup>                                |
|                                                           | <b>Double Negative 4 (DN4)</b><br>CD19 <sup>pos</sup> CD27 <sup>neg</sup> IgD <sup>neg</sup> CD38 <sup>neg</sup> CD24 <sup>neg</sup> CD21 <sup>pos</sup> CD11c <sup>pos</sup>                                    |

**Supplementary Table 3.** B cell subsets absolute counts.

| <b>B Cell Subset</b>             | <b>Control</b>            | <b>Mild/Moderate</b>       | <b>Severe</b>              | <b>Critical</b>            | <b>P value<br/>(Mild/Moderate vs<br/>Severe)</b> | <b>P value<br/>(Mild/Moderate<br/>vs Critical)</b> |
|----------------------------------|---------------------------|----------------------------|----------------------------|----------------------------|--------------------------------------------------|----------------------------------------------------|
| CD19+ B cells<br>count/mL        | 58,310<br>(36,971-68,804) | 99,810<br>(54,599-166,600) | 73,041<br>(39,747-108,953) | 67,147<br>(29,062-101,090) | ns                                               | ns                                                 |
| Memory B cells<br>count/mL       | 20,925<br>(19,214-25,679) | 23,126<br>(12,956-37,155)  | 14,258<br>(6,412-18,904)   | 17,593<br>(6,379-24,273)   | 0.018                                            | 0.048                                              |
| USwM B cells<br>count/mL         | 2,867<br>(1,630-3,375)    | 2,667<br>(1,821-4,522)     | 1,030<br>(510-1,848)       | 1,316<br>(606-2,136)       | 0.001                                            | 0.007                                              |
| SwM B cells<br>count/mL          | 18,425<br>(16,125-22,080) | 20,328<br>(10,240-32,953)  | 11,353<br>(5,689-16,401)   | 15,847<br>(5,655-21,351)   | 0.02                                             | ns                                                 |
| ASC<br>count/mL                  | 334<br>(162-437)          | 1,276<br>(669-1,725)       | 1,127<br>(922-2,781)       | 909<br>(296-3,082)         | ns                                               | ns                                                 |
| T1/T2 B cells<br>count/mL        | 697<br>(544-976)          | 7,497<br>(2,065-9,608)     | 1,674<br>(602-5,098)       | 1,433<br>(473-976)         | 0.006                                            | 0.006                                              |
| TrCD21neg/lo B cells<br>count/mL | 137<br>(71-297)           | 2,626<br>(549-3,503)       | 810<br>(304-1,616)         | 695<br>(106-3,043)         | ns                                               | 0.02                                               |
| TrCD21pos B cells<br>count/mL    | 571<br>(461-803)          | 4,376<br>(1,312-6,120)     | 304<br>(38-1,785)          | 358<br>(272-1,981)         | 0.0002                                           | 0.002                                              |
| Non-Classic Memory<br>count/mL   | 8,945<br>(3,013-12,604)   | 11,578<br>(9,270-18,929)   | 12,579<br>(5,685-16,615)   | 9,912<br>(2,678-16,499)    | ns                                               | ns                                                 |
| M CD27neg IgDneg<br>count/mL     | 4,321<br>(1,956-7,114)    | 7,691<br>(6,068-12,274)    | 7,597<br>(3,839-1,678)     | 6,556<br>(1,496-9,592)     | ns                                               | ns                                                 |
| M CD27neg IgDpos<br>count/mL     | 2,641<br>(1,054-4,603)    | 3,838<br>(2,977-9,169)     | 3,064<br>(1,399-5,664)     | 3,008<br>(1,338-5,565)     | ns                                               | ns                                                 |
| DN B cells                       | 7,706                     | 14,439                     | 10,240                     | 15,919                     | ns                                               | ns                                                 |

Supplementary Material

|                           |                          |                          |                          |                          |       |       |
|---------------------------|--------------------------|--------------------------|--------------------------|--------------------------|-------|-------|
| count/mL                  | (4,436-10,009)           | (7,964-25,352)           | (5,605-25,317)           | (4,334-19,937)           |       |       |
| DN1 B cells<br>count/mL   | 3,818<br>(3,235-5,219)   | 6,414<br>(3,752-11,897)  | 3,605<br>(1,595-5,127)   | 3,586<br>(500-6,751)     | 0.008 | 0.009 |
| DN2 B cells<br>count/mL   | 30<br>(14-245)           | 46<br>(24-98)            | 82<br>(24-477)           | 24<br>(0-46)             | ns    | ns    |
| DN3 B cells<br>count/mL   | 2,862<br>(1,122-5,580)   | 5,044<br>(2,992-13,778)  | 5,962<br>(2,924-20,086)  | 10,446<br>(2,558-14,506) | ns    | ns    |
| DN4 B cells<br>count/mL   | 4<br>(2-10)              | 0<br>(0-18)              | 0<br>(0-14)              | 0<br>(0-12)              | ns    | ns    |
| Naive B cells<br>count/mL | 12,131<br>(7,814-22,430) | 20,113<br>(7,649-56,431) | 16,885<br>(7,053-30,327) | 13,380<br>(4,928-28,841) | ns    | ns    |
| resN B cells<br>count/mL  | 12,066<br>(7,755-22,361) | 17,567<br>(7,649-56,268) | 16,761<br>(7,035-30,111) | 13,279<br>(4,902-28,748) | ns    | ns    |
| actN B cells<br>count/mL  | 62<br>(32-71)            | 82<br>(41-333)           | 128<br>(57-260)          | 90<br>(9-152)            | ns    | ns    |

Data presented are the median (IQR). P values comparing mild/moderate and severe or critical cases were obtained by a Kruskal-Wallis non-parametric ANOVA and Dunn's uncorrected test. IQR, interquartile range.

**Supplementary Table 4.** B cell subsets frequency comparisons in age-matched COVID-19 patients vs. healthy subjects.

| <b>B cell subset</b>       | <b>p-value<br/>(Healthy subjects vs COVID-19 patients)</b> | <b>Test</b> |
|----------------------------|------------------------------------------------------------|-------------|
| T1/T2 B cells (%)          | 0.0030**                                                   | U           |
| Tr CD21 neg/lo B cells (%) | 0.0009***                                                  | U           |
| Tr CD21 pos B cells (%)    | 0.0057**                                                   | U           |
| ASC (%)                    | 0.0019**                                                   | U           |
| Memory B cells (%)         | 0.0493*                                                    | t           |
| USwM B cells (%)           | 0.0102*                                                    | U           |
| SwM B cells (%)            | 0.0859 <sup>+</sup>                                        | t           |
| DN1 B cells (%)            | 0.0617 <sup>+</sup>                                        | U           |
| DN2 B cells (%)            | ns                                                         | U           |
| DN3 B cells (%)            | 0.0285*                                                    | U           |
| actN B cells (%)           | ns                                                         | U           |

\*\*\* p < 0.001; \*\* p < 0.01; \* p < 0.05; <sup>+</sup> p < 0.1

P-values by results of U-Mann-Whitney or t-test for the comparison of the B cell subset frequencies of between healthy controls (n=7) and COVID-19 patients (n=11). All subjects in this analysis are 32-41 years old.

Supplementary Figure 1.

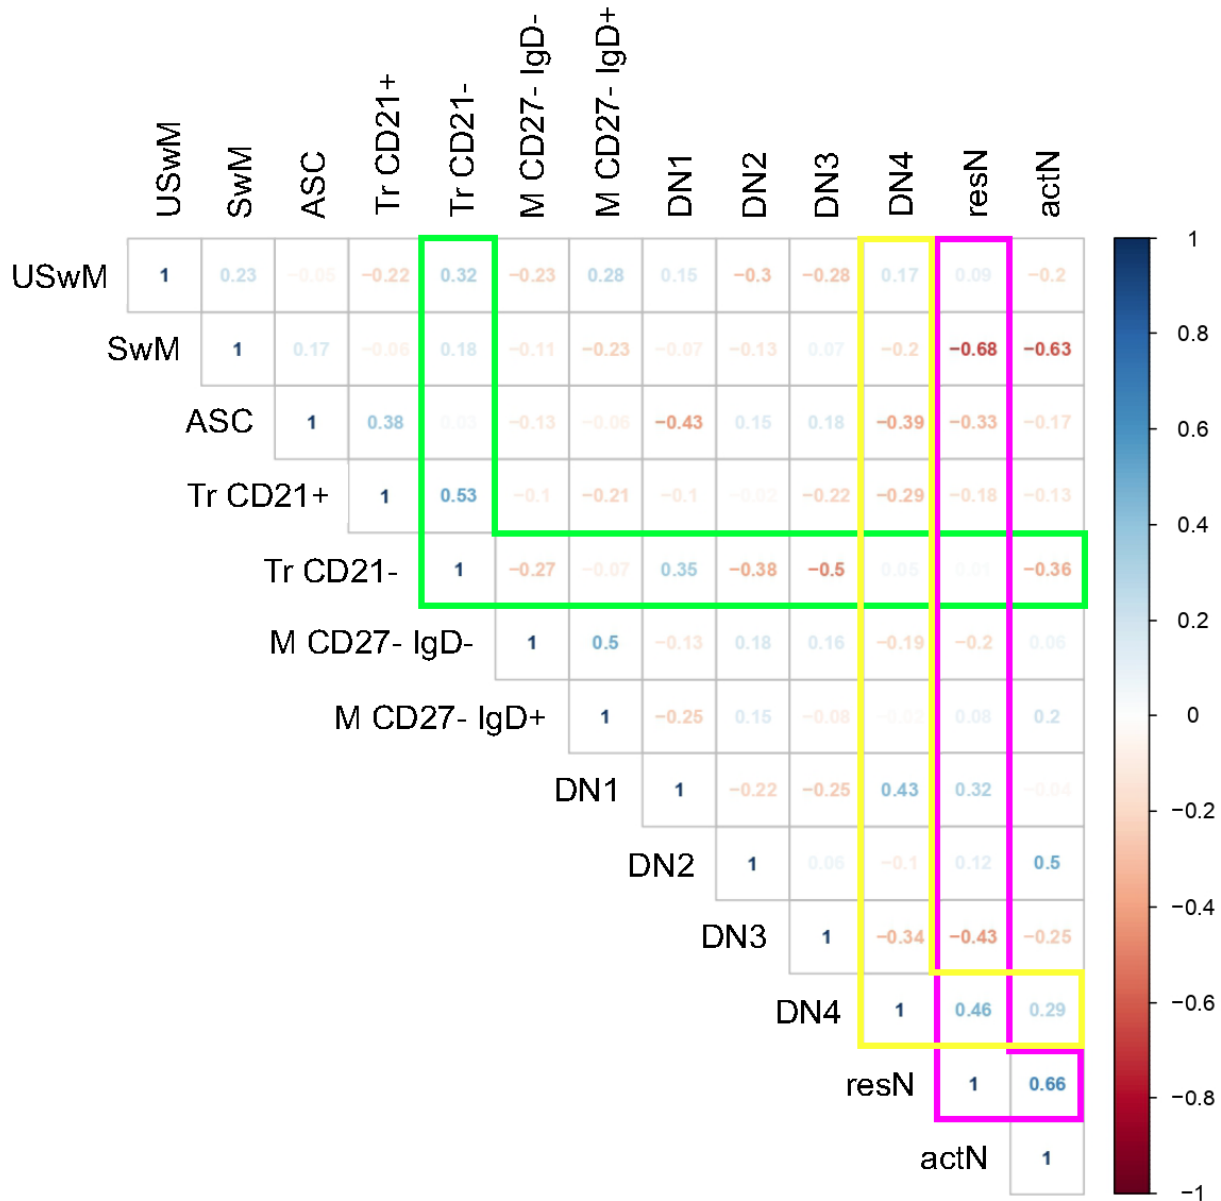

**Supplementary Figure 1. Correlation matrix comparing B cell subsets from COVID-19 patients.**

This matrix comparing all parental-derived B cell subsets, showing the Spearman's correlation coefficient values according to the color scale on the right side; the color intensity of numbers denotes correlation strength. Enclosed values in green, yellow, and magenta indicate a high number of moderately-strong correlations among T CD21<sup>-</sup>, DN4, and resN, thus making them susceptible to exclusion from hierarchical clustering analysis.
